# Supplementary material
Source: publisher figshare collection journal article supplement (https://plos.figshare.com/articles/dataset/_/754817)
Supplement: Supplementary file 1 [file 1 › Figure_S1.pdf]

[illegible]

5161 ggcccgtagtaggggcagaaacaaggggcctgcccaaccgatatctggcctaaaattgcccgcatcggttgttgatgctgtccccgaagcgactgccccattggccccctggggccaaacg  
5281 attgcatttttttttttttttacctacacgctccccgatatcgccacctgtaggtggggatatacaggtgaagatccactcgcttggcgatcttgccaagcgagtggtatctcaacatgta  
5401 tgggggccttaagggcagtggaacccagtcacaaatgttagtcccccaataaatgcacatttgaaatcttaaaagccatgtgagtgcgaaatctcctttacaatgttggaatatatatat  
5521 tcagcagtcacagaacagtttagtaacttatctatattttttataactttatatttgttgccttctgaattatttagcatattatcatagtgttctgcaccacagtcagagatgtgtta  
5641 aatgtattgggtctgcttgttaaaaaacataattttttgtcgggcaccagttattttatattaatccagtgcccttctctacagagatctgatatgtagggaaatgttcagtttacactgag  
5761 aaactgctgtgtggttagctgtcacaaggcaatcagtgggctgggccttattcagttgtcacaagcgaggggcatctaaagccactccccagcctctgttttactcccccccc  
5881 ccttaatgggaggagaggaatgatgattttgtagggcagaggaagagattgtctgaggtctgtatgagcagagaacagagccctacgagcagctgggcacctgtgtcttgtgggctttgag

480253 GGGATTTAGACATTGATAATTCTGAATCGTGTGGGTAGCTGTTCTTAATAG [EXON I]

480304 gtaaagtatctgtatgtttctattattttataccttattttacacatgttcagccttgttgttaataattgttcaactaattgcattattttccatgatatggcacagtggttagtatgccc  
480424 atttttaacatgatacatggtacatataagatgtctatgatgcacatgcataatagatttaaaatggttaataaaaaaattgtatgtgtcagtatatgaagtgttttgcttgtctaataac  
480544 tatgactacatcaatatctctctttgtatatatacattcataataatgctgaatgtaaagaattcaacaaacctatagttacagatacattaatcttgcagatttgagatatatttatc  
480664 aaagggtagacattttttcacatataatttttaaaatatataacctgagtatagttaaacattttttttattatgcaatacaaatcagaaaatacatatctaaatgggttgtccatgtt  
480784 ccaaacactatttttttagttcagctggtatttagacagaacacaagaaataaataatttttttcagttgctttttattcttttttctaccttctcatgtcttctctggagcagccctgtaaga  
480904 gggtgggtcactgacactgtaactaagcataatccccggaattcattaaaggggttgttcacctttgagtttaactttttgtatgatttagagactaattttggagacaattttacaattg  
481024 gtttaaattttttattattttgtatttttttaattattttcactttttgttttagcagctctccagtttttagcagctatctgggtgctaggggttaaatcccttagcaaccagggagtggtt  
481144 taaatgagggactgggtttataaacaggagaggaactagacagaaaaataacttatgtaaagtaacaataacaataaagctggagcctcacagagcaatagtttcttgactgccaaaggtca  
481264 gtgacccctgtttgaaagatgcaaagagttagaataaaaaggcaataatttaaaagctattaaaaataataactgaaaaccaattaaaaagttgcttataaatggccattgtatgacata  
481384 ctaaagggttaacataaaagggtgaaccacccctttaaaggcagctgttagaactgattcaatagttgcaaacctggtagctgtgagaaatgtaccaactaatgtagaaaattgtaacagttca  
481504 aaggctgcacctagaatactgagccgccagactgaaacacccacagagtagaacaacacagtttttagcttcagtttttagaaaaatgggtcaaaaaataaaaaatagttaatgttattttctggt  
481624 gtacaatcagaacaaactgaactggaaaaagtggttagaaggtgagcaacgcctttaaagttttacatgatatgcaacttcattcatgtctacataaaatttcctgtatacactggctctgt  
481744 aaataaactagacagtttagaacctattttctattttgaaccagtccctgaatgctggaatgataaatgcagtggttctatagcattttcttacaatatcaccatattttaagctgctgc  
481864 cttgggcacaggcctatgagaggctatataatataacctccagagaatcggcactcaccactccataggtaccggccaggtgctgaccagagatatgcaaccaatatgtagaaagcact  
481984 cacagcgtttatttagatcatcgcatctacgaacaaagtcataccaccccccgatgtgtgtgaaaaatcctgacatccagaaaaataaattgtatccttagcataattcagggagaattt  
482104 tactcgagtggaagggctggcaacgaactattcggctccaatgagggggccacattagagcccatgtgtgctaggtcttttgcaaatagaaagtgtgttcaaacctaaaatagttaga  
482224 agttaagactaatcgtagcaaatagcacaaaaattcatctggtggagcccccttatgtccttctttaagtgttttttcaagttgcaatccctcatttagataatagtatataaattgc  
482344 acacatccaaagtgcacaaatagtggtgtcctctggaagggggccaaattgcctcaaagtgttcagtaaaagatgacgtgtcagccacatatgatctcatatgagcacactgtggctgcaaaa  
482464 agctatccaaaaaaatggctacattagaaaaaagtgaacctctggctgatatgatagggcgaccgggaaggggctgatacatttctatgcacctttgggaaagtgtagatgatcgggacact  
482584 tggggaattgggttgaaagaaattcacggcattcctgactaatccatccggctgtcagagcaagttctagttccatatctaatttccacttaaaatttagtaatagggtccccaggcagtc  
482704 tatcatatacattgggtatcagaaagctgttgcaacaactcatgtttgtaataaagttaaataccaaaagtactaccactccgcctttatcagaagggcgactataagttgtttatcattcc  
482824 gtaaagagttgatcgcatccctttctgaagtcaacattttggagaaatttttttagattttctcaacaacgcattactctctctttgtaaaatcttggaagaaagttttaatagaagttg  
482944 cagtattgggaggggtcaaagtactaaccaggtggaacttttctctttgtacatcagtgctatccttaaagtgatctttcaattttaatttgcggtgaaacctaaatagatcaacttcaa  
483064 gatcaaaaggatctttcctttttccccagtgtagtacatgttggttcaagttaaatatcactgtgtgggttttttgggggcctgccccttcgatttaccacccccccacccccccc  
483184 gacgggtgtactttcttttctttgtttattcctaaaaaacaattgtgtggataacaggtactcctccctcctgtgcaacacatgggtatagttgggcgcgtgggctcagagtcagatgag  
483304 ggtgagtcocccagagctatcaatggtggacaaatttctatctctcctaaaatggcggttaggttttcttaggcacctccccccgactgatcaaccaaccatacactctccggctccttgtaa  
483424 tcttggtcaacttttagtaatttttagcttattttaaatgatataagctccttgctctatattgttgtacccctgcctccaacttttgatccaattaacagactgggtctgtagttgaaatcatc  
483544 aaagacttattctccaattcagcaatattgggctgtattttggctagttctctacctgcttctcgcataacaagtaacataagatcaagggaacattttgtttaggatgccgcaccaatgg  
483664 ctacaaaaatctgaattagacctccctattgtggcacattttgcatcctaaatcccccttggaatcttacgtgacctctcttgctttttatgagctagttatgagaaatgctgaatttttg  
483784 tgtgagcaattaatcatgacctgcttttttattgcttttttattaactagatttgattgtgatattatttgcctccgatgaattgatttcttcgttttgatgttttttaatttttttatatg  
483904 cttatataatttatgtacgctgaatcactattattaacttgaccacatatgtgggttggcactgaattgagtgatactctcacattttcatattatacaccatatacgtatttttaactt  
484024 tcccacatcgtgggttgggtcttagtatttttatcttattgctagctaacccccaccgtctgttagctctaaatcctatatgtgatagtagtgatacgtattttaaagaattatacagtat  
484144 attctgagtaatctttgcactttacaatagttgggttttacttgtataatgtgggttagcgccccctagctgggtgataattaggggttttttagtaagttctttctatcactgaagttgata  
484264 tgattatagttattggccacatacaccttgatagagtagtgaattgatgggtgtgcactgattgggtctatttttgtatttatgtatgcactttacttcccttcactatcctgatgatgc





493684 GAGGTATCACAGTCGGGTGAACAGAACAGAGCAAAAGGAAAAAGAGGAAGGCCTAAAGGAAGCAAAAACAAATACCCATCTTGGTTTGCTCTGCAG [EXON V]

493780 gtgagacaagtacctggctaatttaacattaagttccctttacatcatTTTTTTTTTTTTTTTTTTTTTTTTTaaagtatgattttattgtttttgtgtaacttaaaaaagaagaaagtatg  
493900 aggagaaaagggaagatagcaatagggtacacagtaactgaatcacatatcaagtttacatacagtgactttgcataaaaatttagcatttgcggtgaatgccatactctgtatttatat  
494020 tactagggttacatttcaattggtagactgaagagctctggttgctctgagggccttagaccacatctggtgttttggggtttatgtccaacatggggaccagattttttcaaatttacg  
494140 taattatTTTTAACAGTactttaacattgtcacatagttagctatcttatctgttcctaaatctctgcataattaccgtttcttatggcaggggttgctgtgttgagattggccacctca  
494260 tghtaataaaaagcactgccttatgaaatcaaacactatatacaagttatactatcctaactagtaataattaatttaattaattcatttaactagtaataattaatccccccag

494372 CAACGAACACCGGGGAGCTCCAAAAATGGGACGAGGGGAGACCCAGAAAAACCAGTTGACACGAATGGCACTGTGGTTCCCAAAAAGACCACGGGGGAGGCCTAAAGGAAGTTTGAACAAAATC  
494492 CCTTCTGCAAAAAAG [EXON VI]

494507 gtatgatgacttcacttataggccattttacattctctgttggtgtttttatttgctgagacagccaatgtgtgcatcataaagtttgcaattaataaatgaaattgttattatTTTTaaaca  
494627 gacaaaaaaaaaattcattgttttagcagaattgcagtattaagccagggttcagtagtgcttcagagaattaatttgggtgccatttgggttttttttagagacggaaccctcataattttt  
494747 gtacctgcaggatcctgttttgggtttttttggccctttttattttgactttaaagatttatataatttcgaggagctgactattcagcaagtataattttaattataattttatttcattttt  
494867 ttt

494885 CTTGCTGTCAGTATGGGAAACTCTTGTGCACAGAAGAGAGGGCGTCCAAGGAAGCATTTATTACACCTTCCAACCTTTAACCCCGAAAAGACCCAGAGGAAGGCCAAAGATTGTTAGGATA  
495005 TCATCAGGTGGTCCCAATGATGTG [EXON VII]

495029 gtgagaagcatagagatcgaccaatga aaataataaatgccatgtaaactgtacatacacacacatatattaatgaatatattgccatccattagtaaaaaaaaaactttacatgagcaat  
495149 cctgggtaactgcaaaagagttttttacatgtggcaactatttgggttccctgagcaccagtcattgtctggtttgttactttgccatataactttgccgtctttgctagtctctgaaactg  
495269 gtggagcaatccaacaattgcctattttagaattcttcgaacaaagcaaaaatccctccttcctatcaaaaatcttcaagatcatggcatgcatacttgacctcccagcttttggcattggt  
495389 ttgccactaaggctgagtaataccacagcagcttagctaaacctttaaagttatgatggccagggtagtcctcttttttttttactttgataaaacagttaaagtcaaaaactgtatta  
495509 agcacactgttcagtaa caattttt acttgatatttttacag

495550 GTGAAAGGATTAAGTGTGGAAAAAAGTGAAGAAACCAGTGGCATTGGTAGACCTTGAATAAATGAAGCCTCTTCATACTCCTTATGGGTTTCAGGAATGAAAAATAAAATTGACTAGAAAGCA  
495670 GAATGCAATAGTGAAAAGGTTGTGACAGGATGTTTTTATAGTGAACAGGTTGTGTAAAATTGTACATCTTTCTCAATGTTACTGTTTTCAATGTGTGCAACTATATATGAGTAACCTCACAG  
495790 AAACAGTAGTTGATTTTCATAATGCTGCTGTTTTCTTTTAACATATTTATAAATTGTTTTGTGTGGTAATAAAAAATTTGTTTTTT [EXON VIII]

495874 tgtacaatgtcctctttaaccacaatgaccatagatctgtaataccttatagtcacaactgcatctgctccagtgttttaccttgccaaaactaaaagttgctggggagtacatttttgc  
495994 atttcagttgcctgaccagcaagtgcaccagcagagtcacagccaattaccatccaagtaagtggagaggtaattctgagcattttatgccaaagctgaaaattgtgtggatgacaaatggc  
496114 tgtgaatcgccccatctgccattttggttatggtttaattttttggacaaggaattctgaatttaaggggctgtgaatatgtaggcactccccatagcatttagtcacttggtttggt  
496234 ctcccttttagaaaaaacacattggcctgggaagtcttattacagtgccccctgcttaataaccaattcattgattactaacctgtgtcaatccctaacatggccttgaaggaaagcat  
496354 cttcataagttactttgcacttggggcgagggaatgttctgctaggctggggcactgatgtccttcagaatatcaacctgcaccatgcctggactgactggccctgccattttaagta

**Figure S1. – Genomic locus of *Xenopus tropicalis* containing the *Xhmg-at-hook* gene.** The sequence shown corresponds to the genomic scaffold JGI\_4.2: GLI173032.1 of *Xenopus tropicalis* that shows homologies with *Xenopus laevis* *Xhmg-at-hook* sequences. Exon sequences (I-VIII) are indicated in capital letters while intron and genomic flanking sequences in small letters. Sequences with homology with the different transcripts detected in *Xenopus laevis* are indicated using different colours as follows:

Homology with the 5'UTR of XAT1

**AGG** instead of ATG (correspond to the initial start codon of XAT1)

Homology with the coding sequence of XAT1

Homology with the 5'UTR of XAT2

Homology with the 5'UTR of XAT2 and the coding sequence of XAT1

Homology with the 5'UTR of XAT3

Homology with the sequence coding for the C-terminal tail of the XAT1 and XAT2 proteins

Homology with the 3'UTR of XAT2

Homology with the 3'UTR of XAT1 and XAT2
