# Supplementary material
Source: publisher figshare collection journal article supplement (https://plos.figshare.com/articles/dataset/_/754817)
Supplement: Supplementary file 1 [file 1 › Figure_S2.pdf]

MoXat1 4ng

MoXat3 4ng

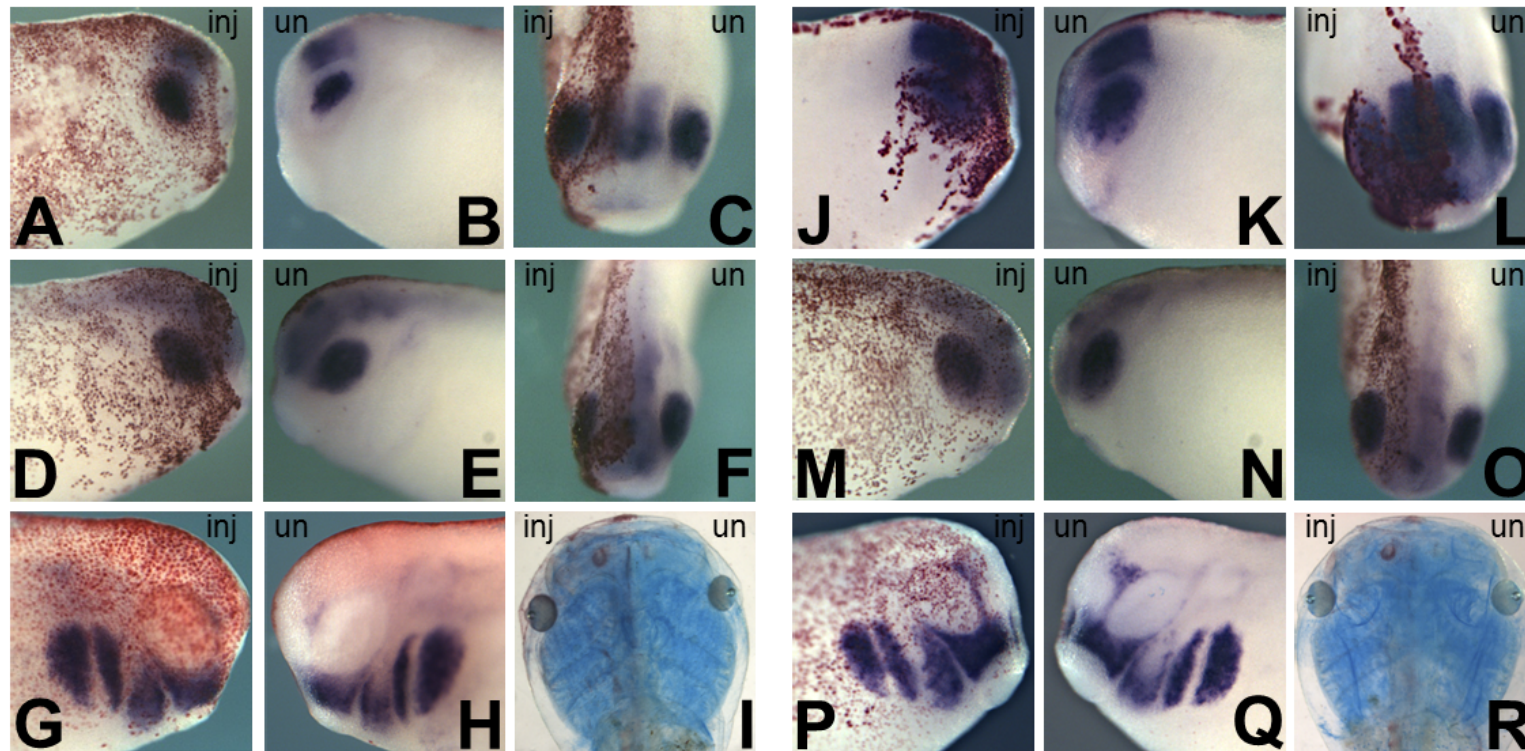

**Figure S2. Results of antisense morpholino MoXat1 (A-I) or MoXat3 (J-R) injections in *Xenopus* embryos.** Injections of 4 ng of single MO does not produce reduction in the expression of Xotx2 (A-C, J-L), nrp-1 (D-F; M-O) or Twist (G-H, P-Q) on the injected (inj) side of treated embryos compared to control (un) side. No reduction of pharyngeal skeleton is observed on the injected side in swimming larvae (I, R) compared to uninjected side.  $\beta$ -gal red staining traces injected side of embryos.
