# Supplementary material
Source: publisher figshare collection journal article supplement (https://plos.figshare.com/articles/dataset/_/754817)
Supplement: Supplementary file 1 [file 1 › Figure_S3.pdf]

## Std CO-Mo 8ng

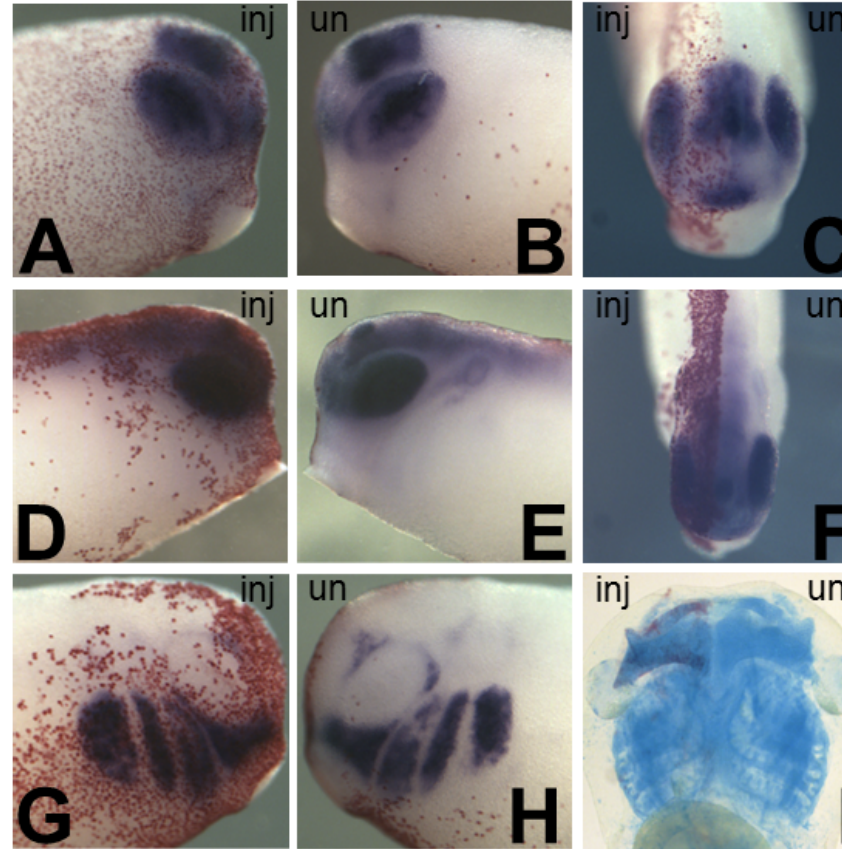

**Figure S3. Results of standard control MO injections in *Xenopus* embryos.** Injections of 8 ng of MO does not produce reduction in the expression of *Xotx2* (A-C), *nrp-1* (D-F) or *Twist* (G-H) on the injected (inj) side of embryos compared to control (un) side. No reduction of pharyngeal skeleton is observed on the injected side in swimming larvae (I) compared to uninjected side.  $\beta$ -gal red staining traces injected side of embryos.
