# Supplementary material
Source: publisher figshare collection journal article supplement (https://plos.figshare.com/articles/dataset/_/754817)
Supplement: Supplementary file 1 [file 1 › Figure_S4.pdf]

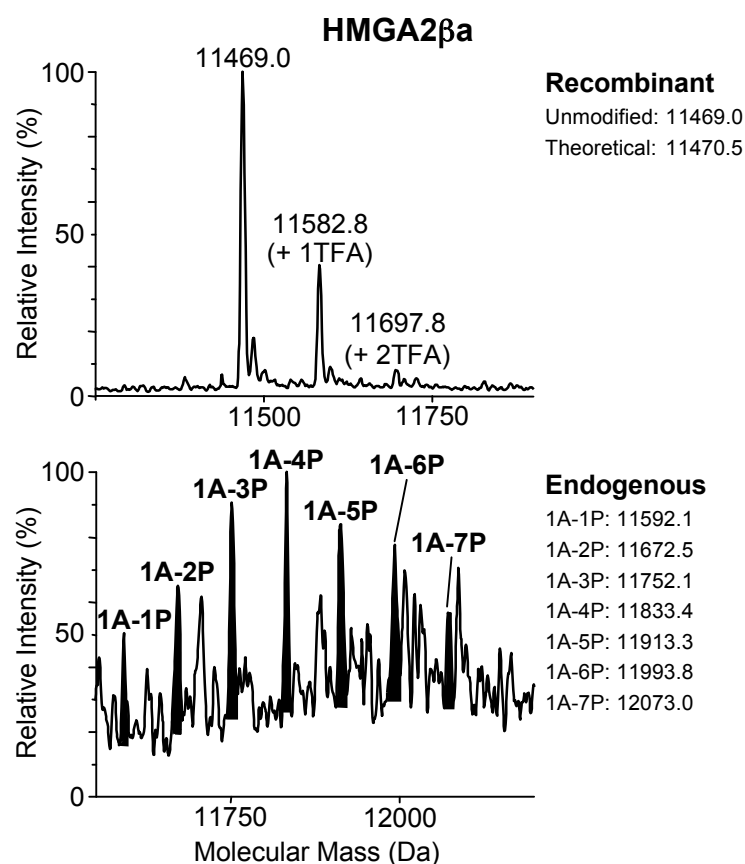

**Figure S4. XLHMGA2 $\beta$ a is constitutively phosphorylated *in vivo*.** In the upper panel the reconstructed mass spectra of recombinant XLHMGA2 $\beta$ a is shown while the mass spectrum of the endogenous one is shown in the lower panel. The molecular mass of recombinant XLHMGA2 $\beta$ a is 11469.0 (theoretical molecular mass of 11470.5). As regards the endogenous XLHMGA2 $\beta$ a and taking into consideration the constitutive N-terminal acetylation (42 daltons), it is possible to find out several peaks corresponding to different XLHMGA2 $\beta$ a phosphorylated forms, ranging from 1P (11592.1 Da) to 7P (12073.0 Da). Mass peak corresponding to XLHMGA2 $\beta$ a are filled in black. A: acetylation; P: phosphorylation; TFA: trifluoroacetic acid adducts.
