# Supplementary material
Source: publisher figshare collection journal article supplement (https://plos.figshare.com/articles/dataset/_/754817)
Supplement: Supplementary file 1 [file 1 › Figure_S5.pdf]

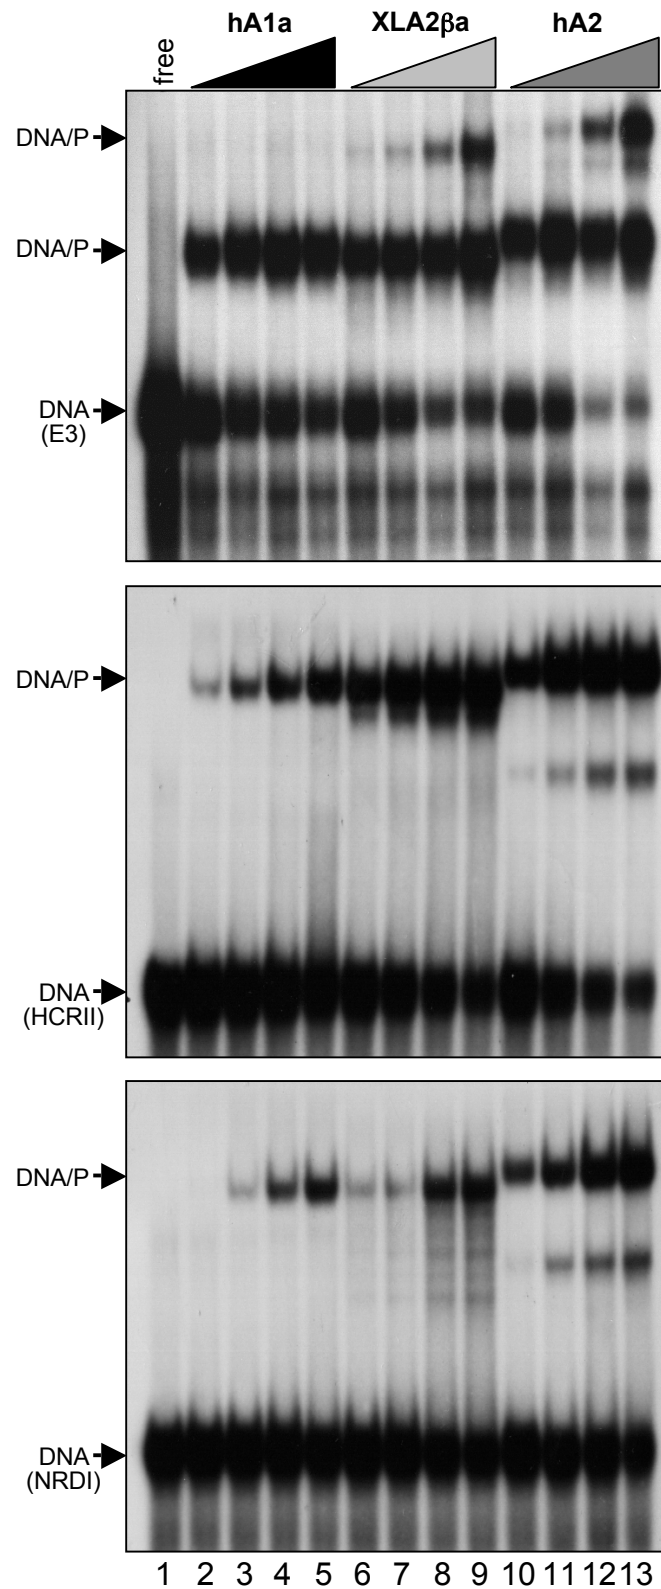

**Figure S5. Electrophoretic mobility shift assay performed with human HMGA1a (hA1a) and HMGA2 (hA2) and *Xenopus* XLHMGA2βa.** Three different DNA probes were used: upper panel, E3 (0.05 pmoles); middle panel, HCRII (0.1 pmoles); lower panel NRDI (0.1 pmoles). EMSA performed with the E3 probe was done incubating 0.25, 0.5, 1, and 2 pmoles of HMGA proteins. HCRII and NRDI EMSAs were performed with 1, 2, 4, 8 pmoles of HMGA proteins.
